# Supplementary material
Source: publisher site journal article supplement (https://www.spandidos-publications.com/3647/downloadSupplementary)
Supplement: Supplementary file 1 [file downloadSupplementary]

Table SI. Sequences of the primers used in the present study.

| Gene            | Sequence                                                                    |
|-----------------|-----------------------------------------------------------------------------|
| sh-ctrl-F       | GATCCGTTCTCCGAACGTGTCACGTAATTCAAGAG<br>ATTACGTGACACGTTCCGAGAATTTTTTC        |
| sh-ctrl-R       | AATTGAAAAAATTCTCCGAACGTGTCACGTAATCT<br>CTTGAATTACGTGACACGTTCCGAGAACG        |
| sh-AL355711-F   | GATCC-G-GTGCCAGAATTGGATTACA-TCAAGAGA-<br>TGTAATCCAATTCTGGCAC-TT-TTTT-GGAA-G |
| sh-AL355711-R   | AATTC-TTCC-AAAA-AA-GTGCCAGAATTGGATTACA-<br>TCTCTTGA-TGTAATCCAATTCTGGCAC-C-G |
| si-h-ABCG1-ctrl | TTCTCCGAACGTGTCACGTAA                                                       |
| si-h-ABCG1-1    | TTCGCCTCATTGCCTATTT                                                         |
| si-h-ABCG1-2    | CTTCGGGAACACCTGAACT                                                         |
| AL355711-RT     | CTCAGCCACCTGTTTGGTAAC                                                       |
| AL355711-F      | CCAGTTGGACGCTGAAGTC                                                         |
| AL355711-R      | CTCAGCCACCTGTTTGGTAAC                                                       |
| U6-RT           | AACGCTTCACGAATTTGCGT                                                        |
| U6-F            | CTCGCTTCGGCAGCACA                                                           |
| U6-R            | AACGCTTCACGAATTTGCGT                                                        |
| ABCG1-F         | TCTTCGTCAGCTTCGACACCA                                                       |
| ABCG1-R         | TCTCGTCGATGTCACAGTGCAG                                                      |
| GAPDH-F         | GCACCGTCAAGGCTGAGAAC                                                        |
| GAPDH-R         | TGGTGAAGACGCCAGTGGA                                                         |

F, forward; R, reverse; RT, reverse transcription.
